# Supplementary material for: Engineering highly efficient porphyrin sensitizers through metal, ligand and bridge modification: a DFT study
Source: Royal Society of Chemistry journal article supplement (doi:10.1039/d4cp03473b), 2024-01-01
Supplement: d4cp03473b1.pdf [file d4cp03473b1.pdf]

## Supporting Information

### Engineering Highly Efficient Porphyrin Sensitizers through Metal, Ligand and Bridge Modification: A DFT Study

Hemjot Kaur<sup>a</sup>, Neetu Goel<sup>a,\*</sup>

<sup>a</sup> Computational and Theoretical Chemistry Group, Department of Chemistry & Centre for Advanced Studies in Chemistry, Panjab University, Chandigarh-160014, India

\* Corresponding author, [neetugoel@pu.ac.in](mailto:neetugoel@pu.ac.in)

**Table S1.** Dihedral angles of the engineered dyes.

| Dye | $\Phi_1$ | $\Phi_2$ | $\Phi_3$ |
|-----|----------|----------|----------|
| SMD | 0.00     | 0.04     | -0.01    |
| M1  | 0.00     | 0.03     | -0.02    |
| M2  | 0.02     | -0.03    | 0.05     |
| M3  | 0.05     | 0.39     | -0.07    |
| M4  | 0.02     | -0.03    | 0.08     |
| M5  | 0.07     | 0.48     | 0.28     |
| M6  | 0.05     | -0.04    | 0.15     |
| M7  | 0.07     | 0.38     | 0.16     |
| M8  | 0.09     | -0.66    | 0.10     |
| M9  | 0.08     | -0.54    | 0.19     |
| M10 | 0.03     | 0.21     | 0.23     |
| A1  | 0.01     | 0.05     | -0.02    |
| A2  | 0.00     | 0.01     | 0.02     |
| A3  | 0.00     | 0.02     | -0.01    |
| A4  | 0.02     | 0.01     | 0.03     |
| A5  | 0.02     | -0.11    | -0.02    |
| A6  | 0.01     | -0.03    | 0.04     |
| B1  | 0.01     | 0.10     | 0.02     |
| B2  | 0.00     | 0.04     | -0.01    |
| B3  | 0.02     | -0.52    | 0.03     |
| B4  | 0.01     | 0.63     | -0.02    |

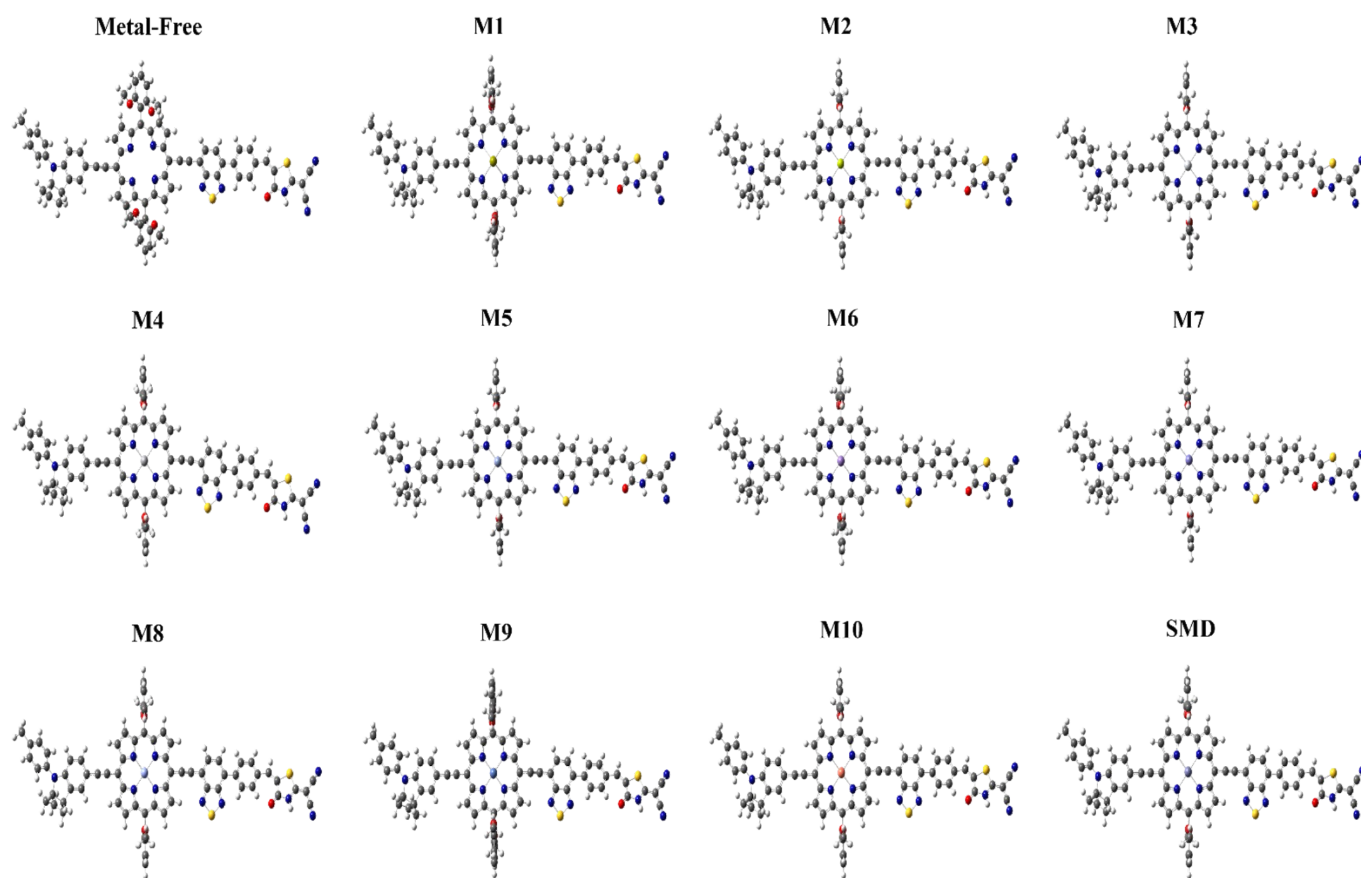

**Figure S1.** The optimized geometries of the metal-free, M1 to M10, and SMD dyes.

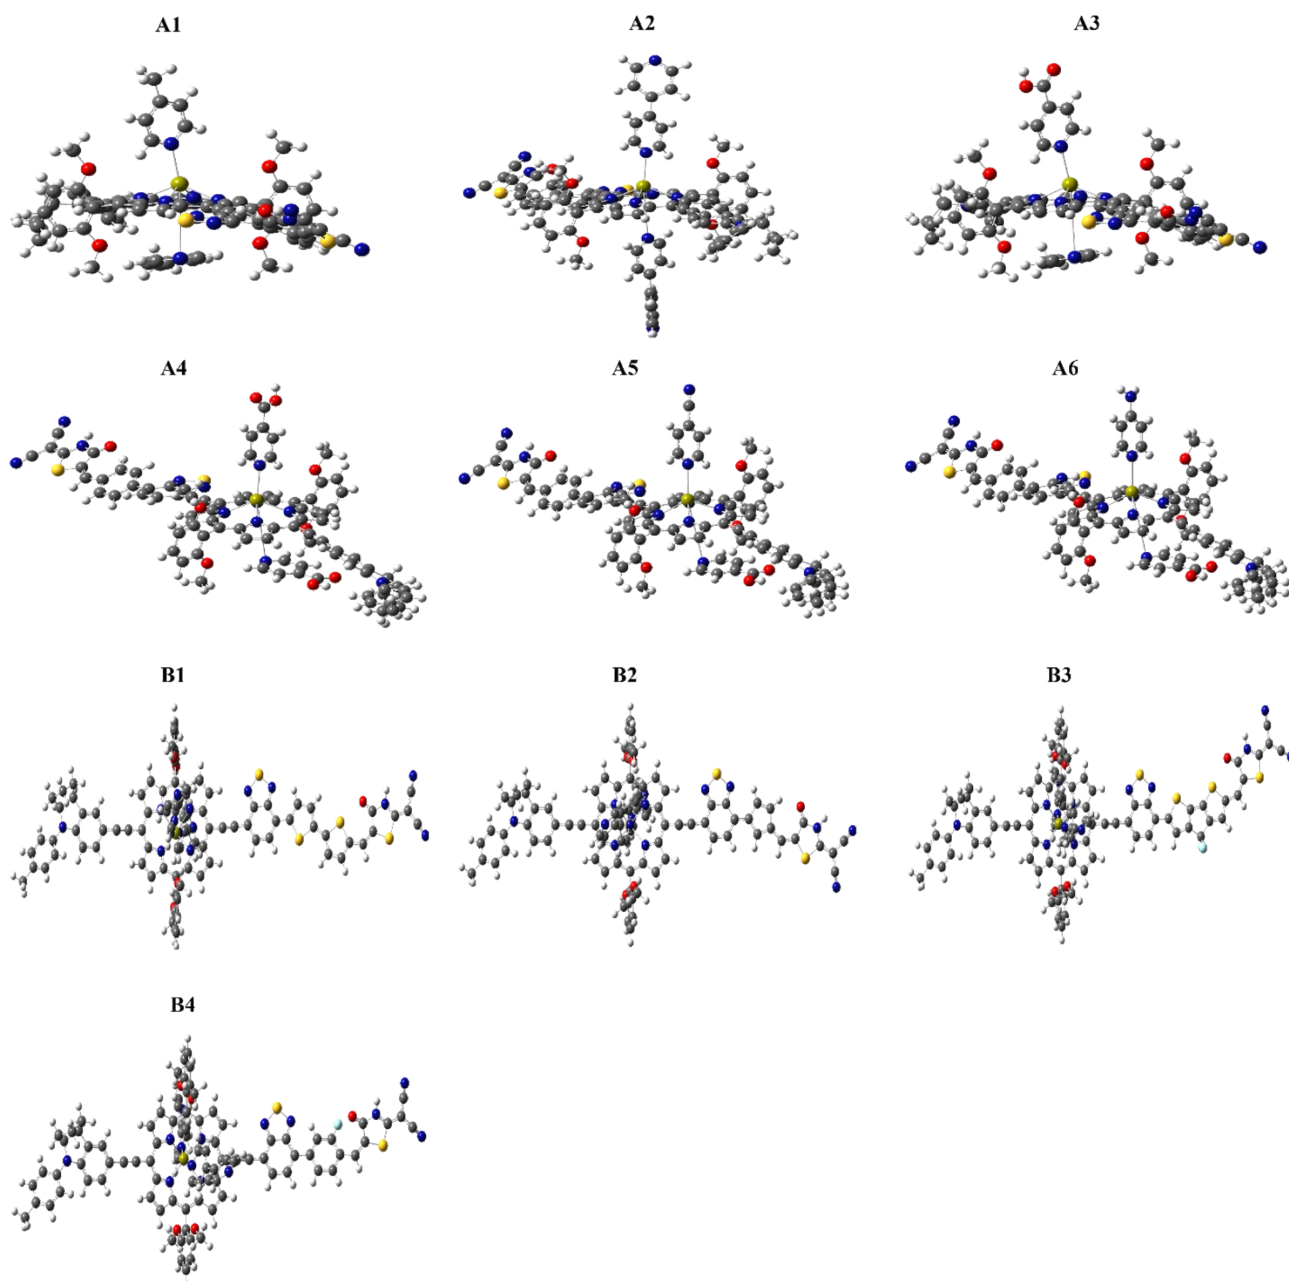

**Figure S2.** The optimized geometries of the A1 to A6 and B1 to B4 dyes.

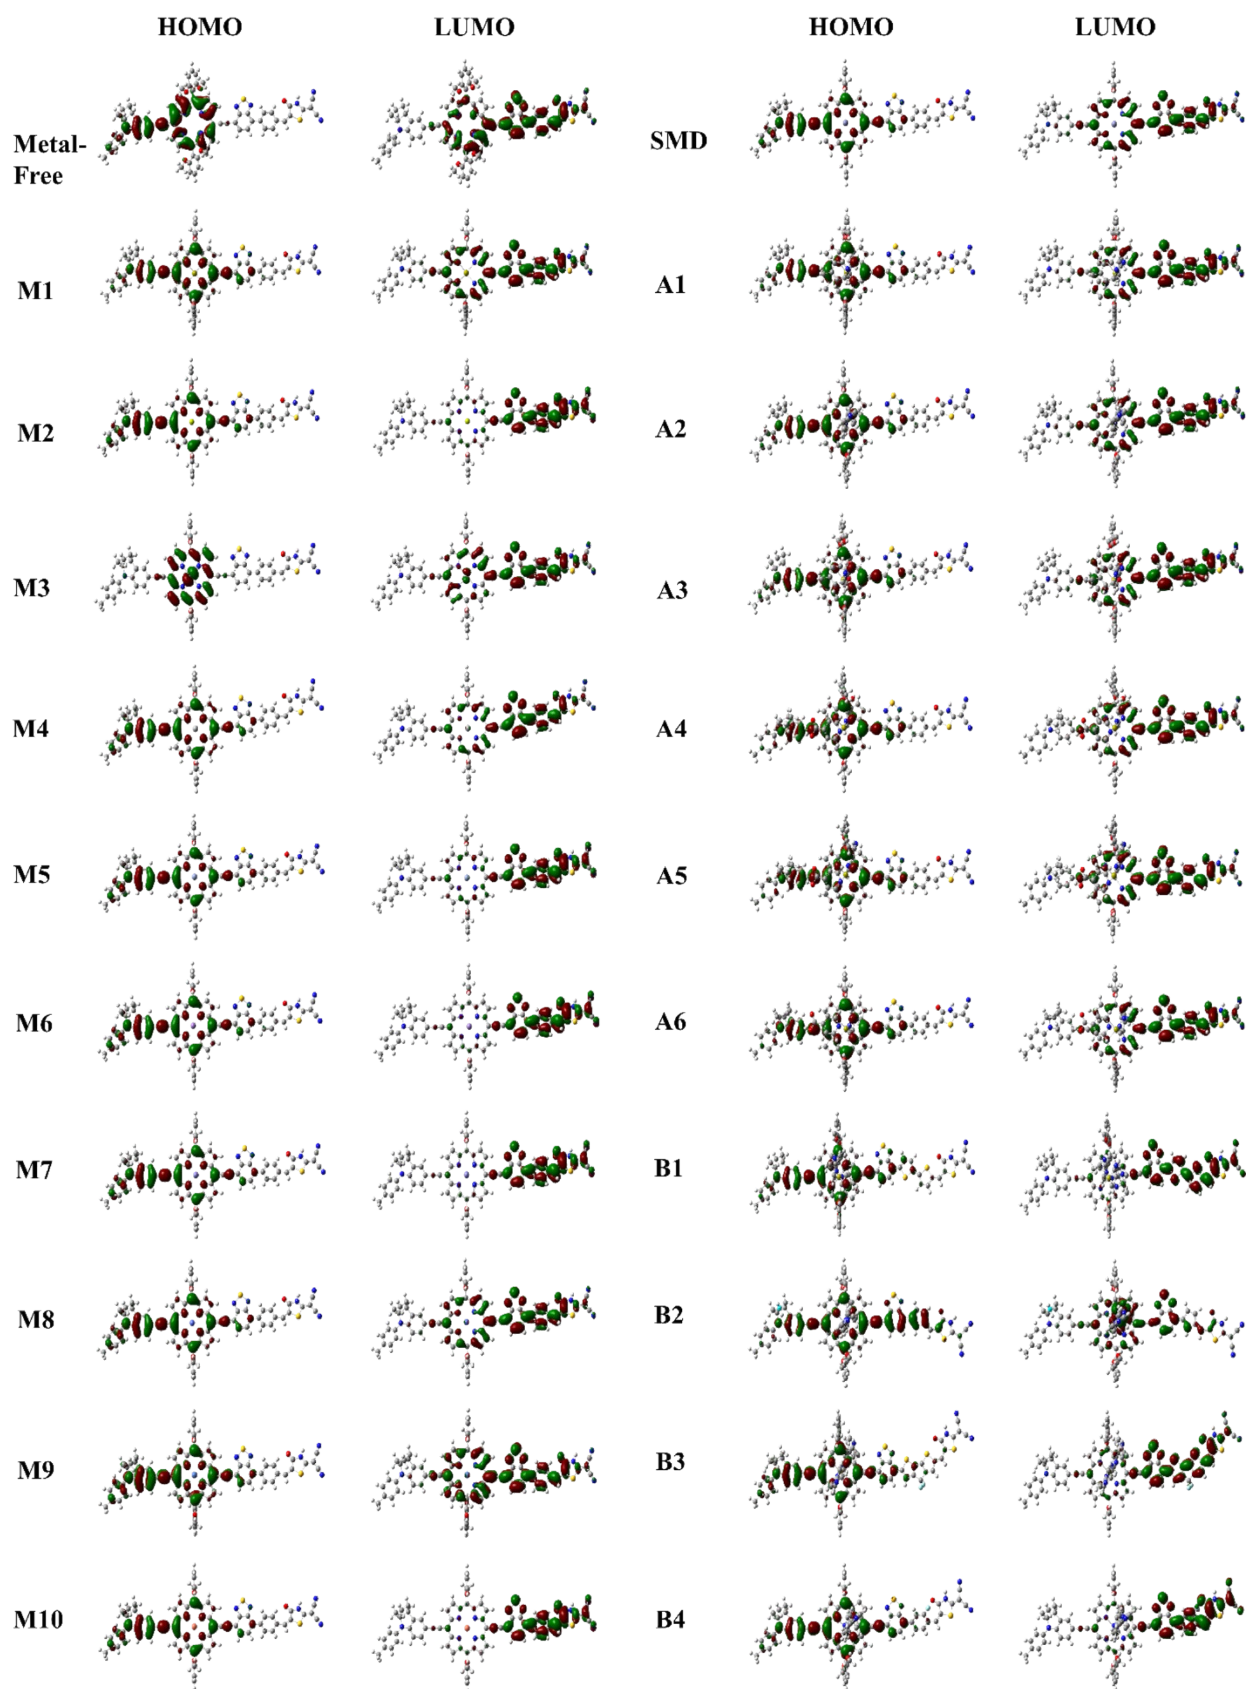

Figure S3. The FMOs of the engineered dyes.

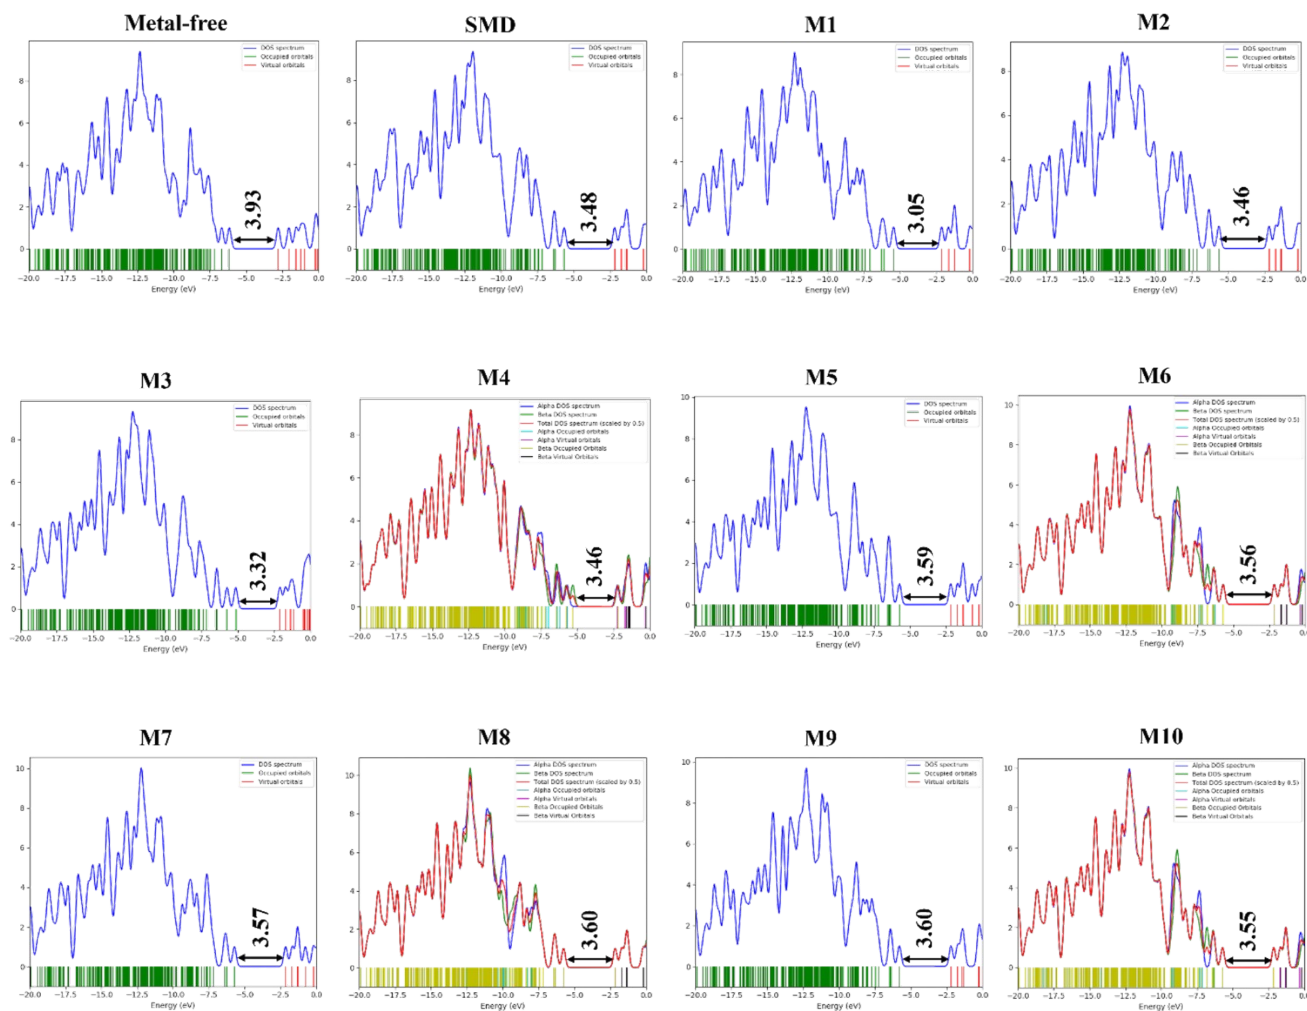

**Figure S4.** The DOS plots of the metal-free, SMD, and M1 to M10 dyes.

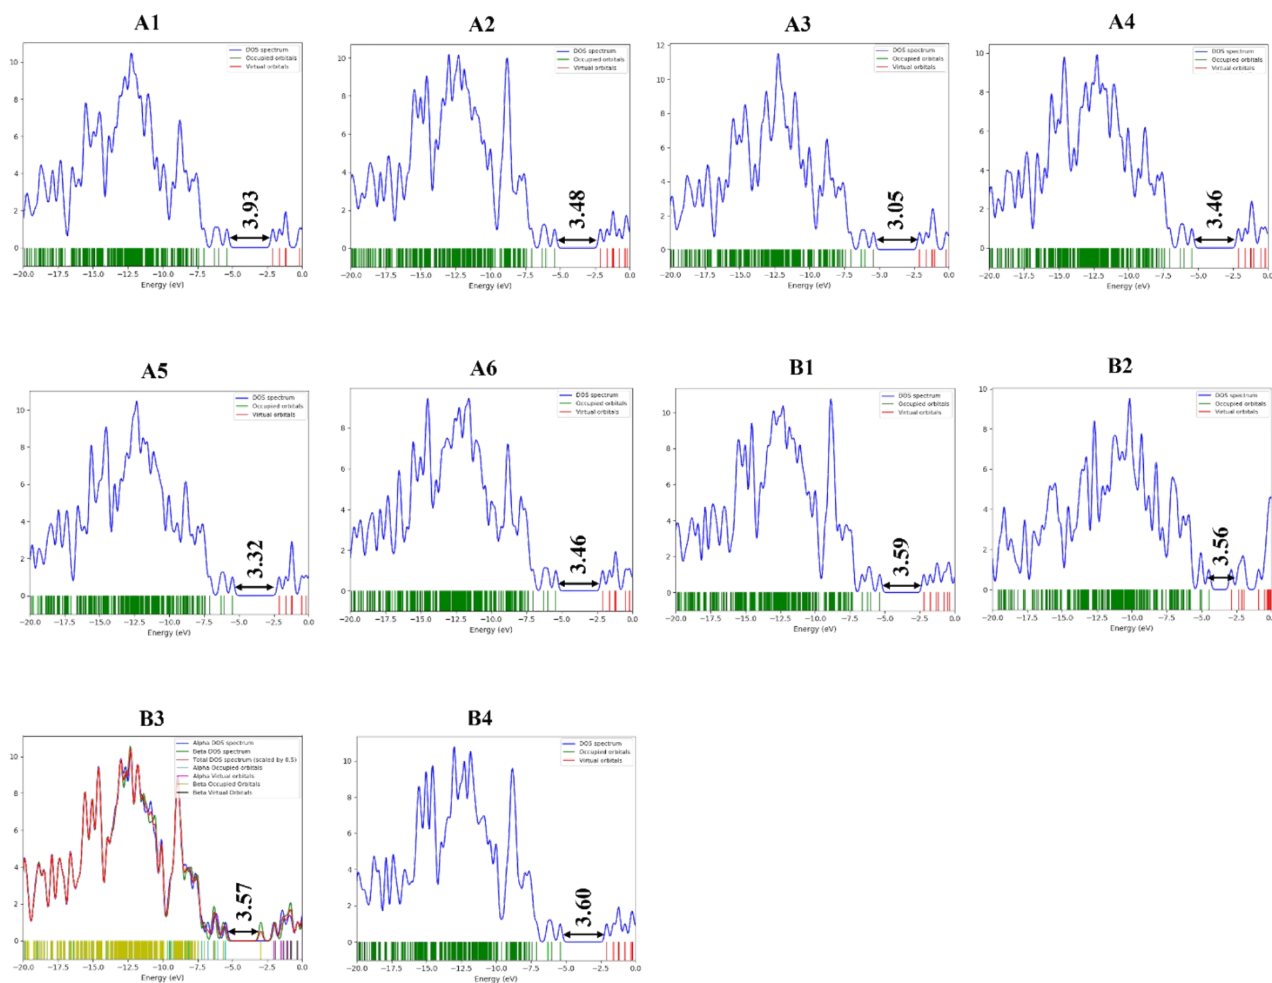

**Figure S5.** The DOS plots of the A1 to A6 and B1 to B4 dyes.

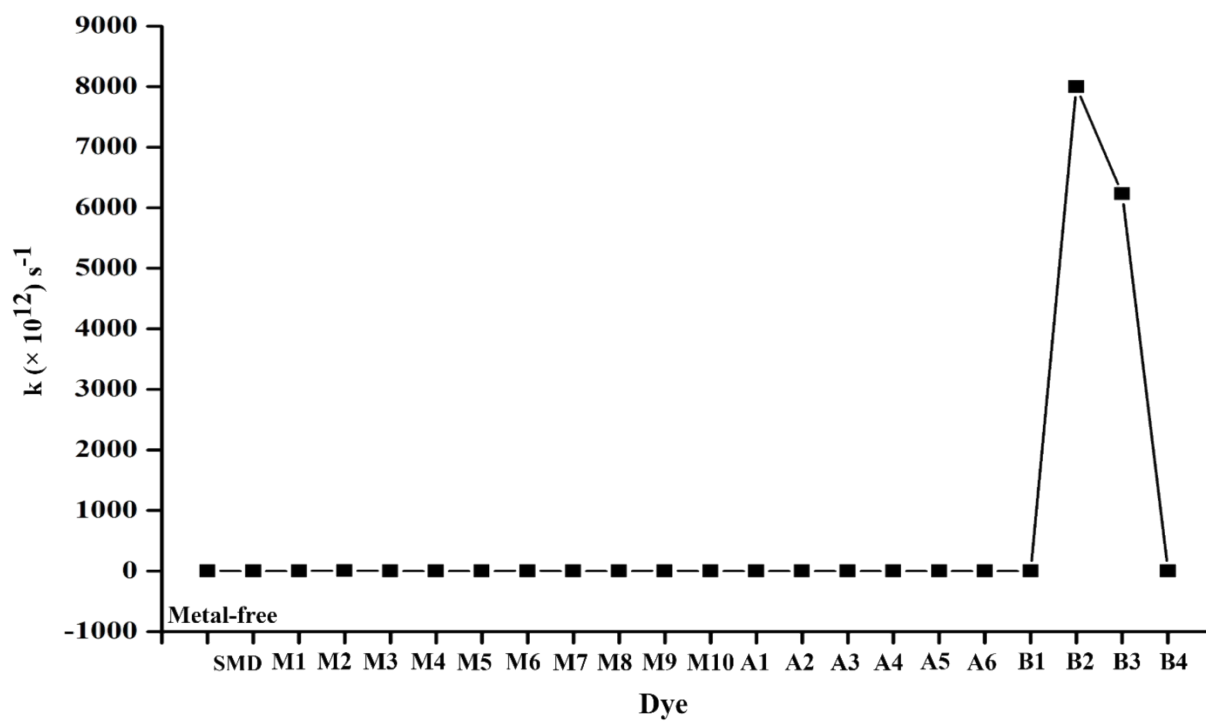

**Figure S6.** The IET rate of the dyes.

**Table S2.** The isotropic polarizability ( $\alpha$ ) of the engineered dyes.

| <b>Dye</b>        | <b><math>\alpha_{xx}</math><br/>(<math>10^3</math>)</b> | <b><math>\alpha_{yy}</math><br/>(<math>10^3</math>)</b> | <b><math>\alpha_{zz}</math><br/>(<math>10^2</math>)</b> | <b><math>\alpha</math><br/>(<math>10^3</math>)</b> | <b><math>\Delta\alpha</math><br/>(<math>10^3</math>)</b> |
|-------------------|---------------------------------------------------------|---------------------------------------------------------|---------------------------------------------------------|----------------------------------------------------|----------------------------------------------------------|
| <b>Metal-free</b> | 3.17                                                    | 1.19                                                    | 5.95                                                    | 1.65                                               | 2.33                                                     |
| <b>SMD</b>        | 3.96                                                    | 1.22                                                    | 5.58                                                    | 1.91                                               | 3.12                                                     |
| <b>M1</b>         | 6.35                                                    | 1.25                                                    | 5.61                                                    | 2.72                                               | 5.48                                                     |
| <b>M2</b>         | 3.99                                                    | 1.22                                                    | 5.58                                                    | 1.92                                               | 3.15                                                     |
| <b>M3</b>         | 4.31                                                    | 1.22                                                    | 5.73                                                    | 2.03                                               | 3.46                                                     |
| <b>M4</b>         | 4.25                                                    | 1.23                                                    | 5.67                                                    | 2.02                                               | 3.40                                                     |
| <b>M5</b>         | 3.94                                                    | 1.22                                                    | 5.64                                                    | 1.91                                               | 3.10                                                     |
| <b>M6</b>         | 3.90                                                    | 1.22                                                    | 5.64                                                    | 1.89                                               | 3.06                                                     |
| <b>M7</b>         | 3.82                                                    | 1.21                                                    | 5.60                                                    | 1.86                                               | 2.99                                                     |
| <b>M8</b>         | 3.97                                                    | 1.31                                                    | 5.68                                                    | 1.95                                               | 3.09                                                     |
| <b>M9</b>         | 3.71                                                    | 1.18                                                    | 6.39                                                    | 1.84                                               | 2.84                                                     |
| <b>M10</b>        | 3.87                                                    | 1.21                                                    | 5.60                                                    | 1.88                                               | 3.04                                                     |
| <b>A1</b>         | 4.49                                                    | 1.32                                                    | 7.01                                                    | 2.17                                               | 3.52                                                     |
| <b>A2</b>         | 4.53                                                    | 1.06                                                    | 12.60                                                   | 2.28                                               | 3.37                                                     |
| <b>A3</b>         | 4.42                                                    | 1.33                                                    | 7.18                                                    | 2.16                                               | 3.44                                                     |
| <b>A4</b>         | 4.26                                                    | 1.30                                                    | 7.55                                                    | 2.10                                               | 3.27                                                     |
| <b>A5</b>         | 4.23                                                    | 1.31                                                    | 7.43                                                    | 2.09                                               | 3.24                                                     |
| <b>A6</b>         | 4.41                                                    | 1.31                                                    | 7.27                                                    | 2.15                                               | 3.43                                                     |
| <b>B1</b>         | 5.59                                                    | 1.05                                                    | 13.65                                                   | 2.67                                               | 4.39                                                     |
| <b>B2</b>         | 6.70                                                    | 1.07                                                    | 12.61                                                   | 3.01                                               | 5.54                                                     |
| <b>B3</b>         | 5.92                                                    | 1.08                                                    | 13.93                                                   | 2.80                                               | 4.69                                                     |
| <b>B4</b>         | 4.16                                                    | 1.01                                                    | 13.19                                                   | 2.16                                               | 3.02                                                     |



**Table S3.** The hyperpolarizability ( $\beta$ ) of the engineered dyes.

| Dye               | $\beta_{xxx}$<br>( $10^5$ ) | $\beta_{xxy}$<br>( $10^3$ ) | $\beta_{xyy}$<br>( $10^3$ ) | $\beta_{yyy}$<br>( $10^2$ ) | $\beta_{xxz}$<br>( $10^4$ ) | $\beta_{yyz}$<br>( $10^1$ ) | $\beta_{xzz}$<br>( $10^3$ ) | $\beta_{yzz}$<br>( $10^2$ ) | $\beta_{zzz}$<br>( $10^1$ ) | $\beta_{tot}$<br>( $10^5$ ) | P<br>( $10^5$ ) |
|-------------------|-----------------------------|-----------------------------|-----------------------------|-----------------------------|-----------------------------|-----------------------------|-----------------------------|-----------------------------|-----------------------------|-----------------------------|-----------------|
| <b>Metal-free</b> | 2.76                        | -8.36                       | 2.96                        | 20.74                       | -1.92                       | 162.61                      | 7.83                        | -3.05                       | -120.80                     | 2.88                        | 2.89            |
| <b>SMD</b>        | 8.32                        | 2.99                        | -2.56                       | -1.26                       | -0.55                       | 8.86                        | 0.18                        | -0.67                       | 1.07                        | 8.29                        | 8.30            |
| <b>M1</b>         | -11.64                      | 0.22                        | 2.73                        | 1.70                        | -5.06                       | -16.34                      | 3.18                        | -1.35                       | 53.12                       | 11.59                       | 11.61           |
| <b>M2</b>         | 8.47                        | 2.46                        | -2.74                       | -0.70                       | -0.55                       | 7.32                        | 0.14                        | -0.49                       | 0.52                        | 8.44                        | 8.45            |
| <b>M3</b>         | -8.63                       | -15.89                      | -0.23                       | -1.82                       | 0.12                        | 6.62                        | 1.20                        | 0.88                        | -55.58                      | 8.62                        | 8.64            |
| <b>M4</b>         | 9.55                        | 2.42                        | -3.29                       | -1.18                       | -1.65                       | 11.53                       | 0.78                        | -0.19                       | 44.93                       | 9.52                        | 9.54            |
| <b>M5</b>         | 8.14                        | 3.50                        | -2.09                       | -1.74                       | -0.55                       | 7.54                        | 0.16                        | -0.62                       | 0.66                        | 8.13                        | 8.14            |
| <b>M6</b>         | 8.18                        | 2.96                        | -2.31                       | -0.85                       | -0.55                       | 8.88                        | 0.20                        | -0.70                       | 1.64                        | 8.16                        | 8.17            |
| <b>M7</b>         | 8.01                        | 2.80                        | -2.00                       | -0.89                       | -0.61                       | 7.38                        | 0.15                        | -0.62                       | 0.99                        | 7.99                        | 8.01            |
| <b>M8</b>         | 8.15                        | 3.51                        | -2.08                       | -1.79                       | -0.55                       | 7.63                        | 0.16                        | -0.61                       | 0.66                        | 8.14                        | 8.15            |
| <b>M9</b>         | 7.50                        | 1.91                        | -1.80                       | -1.15                       | -2.29                       | -5.30                       | 7.25                        | 1.40                        | 29.14                       | 7.55                        | 7.56            |
| <b>M10</b>        | 8.04                        | 2.89                        | -2.22                       | -0.95                       | -0.58                       | 8.24                        | 0.18                        | -0.65                       | 0.71                        | 8.024                       | 8.04            |
| <b>A1</b>         | 10.35                       | 6.24                        | -3.00                       | -1.08                       | -2.60                       | 4.32                        | 1.19                        | 0.12                        | 28.20                       | 10.34                       | 10.36           |
| <b>A2</b>         | -10.50                      | -27.08                      | -0.54                       | -1.31                       | -0.38                       | -4.08                       | 2.61                        | 1.08                        | 2.40                        | 10.49                       | 10.51           |
| <b>A3</b>         | 9.99                        | 9.01                        | -2.90                       | -1.56                       | -2.50                       | 10.06                       | 1.24                        | -1.79                       | 55.83                       | 9.98                        | 10.01           |
| <b>A4</b>         | 9.12                        | 12.71                       | -2.29                       | -1.99                       | -4.85                       | 11.83                       | 5.73                        | -0.71                       | 9.52                        | 9.17                        | 9.19            |
| <b>A5</b>         | 8.83                        | 8.28                        | -2.55                       | -1.41                       | -4.51                       | 10.64                       | 5.19                        | -0.52                       | 23.49                       | 8.87                        | 8.89            |
| <b>A6</b>         | 9.91                        | 6.43                        | -2.76                       | -1.38                       | -5.23                       | 7.35                        | 5.24                        | 1.24                        | -40.50                      | 9.95                        | 9.97            |
| <b>B1</b>         | -13.90                      | -22.21                      | -0.75                       | -2.01                       | 0.14                        | 7.99                        | 1.76                        | 0.05                        | -4.48                       | 13.89                       | 13.91           |
| <b>B2</b>         | 32.26                       | -41.09                      | 9.23                        | -0.72                       | -1.49                       | -1.64                       | 0.89                        | 0.42                        | 4.65                        | 32.37                       | 32.40           |
| <b>B3</b>         | -13.95                      | -15.01                      | 0.84                        | 0.06                        | -0.30                       | -20.10                      | -0.13                       | 4.64                        | -86.77                      | 13.94                       | 13.96           |
| <b>B4</b>         | 12.89                       | -1.21                       | -0.49                       | 0.23                        | -0.30                       | -0.59                       | 0.58                        | -1.34                       | 25.60                       | 12.89                       | 12.91           |
